# Supplementary material for: Toxin production in a rare and genetically remote cluster of strains of the Bacillus cereus group
Source: PubMed Central journal article supplement (PMC1888693; doi:10.1186/1471-2180-7-43), 2007-05-21
Supplement: 1471-2180-7-43-S1.pdf [file 1471-2180-7-43-S1.pdf]

## **Additional file 1**

### PCR reaction conditions

For all PCR reactions, the following reaction mixture was used:

- 1 µl or 0.5 µl genome prep
- 2.5 µl forward primer (10 pM)
- 2.5 µl reverse primer (10 pM)
- 1 µl dNTP mix (10 mM each)
- 1 µl DyNAzyme II DNA Polymerase (Finnzymes)
- 5 µl 10× Reaction buffer
- 37 µl dH<sub>2</sub>O

The reactions were subjected to thermal cycling using the following program: Initial denaturing at 95 °C for 3 minutes, then 30 cycles of 95 °C for 1 minute, 45-55 °C (depending on the primers) for 1 minute and 72 °C for 1 minute, followed by an elongation step of 7 minutes at 72 °C.

### Initial PCR detection of *nhe* genes in strains NVH 391/98, NVH 883/00, and INRA AF2

The primer pairs based on earlier published sequences of *nhe* that were initially positive for the three strains NVH 391/98, NVH 883/00, and INRA AF2 were the following three forward primers: cggttcatctgttgcgacagc, gcgaagcaatggtagatgta, and acgttacaacgttgaagtac, and the two reverse primers: tgaattaattttgcgtatgaatccattgc and gcatatgaatccattgcaa. All three forward primers gave positive PCR results in reactions with both reverse primers.

### Details of the PCR experiments that confirm that INRA AF2 has the same gene variants as strains NVH 391/98 and NVH 883/00 for 13 genes:

The PCR reactions listed below were positive and of the correct size for strain INRA AF2 using primers designed from the corresponding sequences in NVH 391/98 and NVH 883/00. The targeted genes were *yvrG*, *yvrH*, *orf2* upstream of *cytK*, *cytK*, the gene encoding an ABC transporter permease protein (*ABC*), *yvfT*, *yvfU*, *plcR*, *papR*, *nheA*, *nheB*, *nheC*, and the gene encoding a deoxyribonucleotide regulator (*DeoR*).

| Forward primer | Reverse primer | Targeted gene        | Size    |
|----------------|----------------|----------------------|---------|
| yvfF6          | yvfR6          | <i>ABC</i>           | 1640 bp |
| yvfF11         | yvfR7          | <i>ABC, yvfT</i>     | 1711 bp |
| yvfF6          | yvfR5          | <i>ABC, yvfT</i>     | 1814 bp |
| yvfF11         | yvfR5          | <i>ABC, yvfT</i>     | 972 bp  |
| yvfF11         | yvfR4          | <i>ABC, yvfT</i>     | 1199 bp |
| yvfF11         | yvfR3          | <i>ABC, yvfT</i>     | 1341 bp |
| yvfF4          | yvfR8          | <i>yvfT, yvfU</i>    | 1677 bp |
| yvfF4          | yvfR2          | <i>yvfT, yvfU</i>    | 1388 bp |
| yvfF2          | yvfR7          | <i>yvfT</i>          | 933 bp  |
| yvfF13         | plcR391R2      | <i>yvfU, plcR</i>    | 806 bp  |
| plcR391F4      | plcR391R2      | <i>plcR</i> promoter | 537 bp  |
| plcR391F2      | plcR391R4      | <i>plcR, papR</i>    | 1367 bp |
| plcR391F4      | plcR391R4      | <i>plcR, papR</i>    | 1840 bp |
| plcR391F1      | plcR391R4      | <i>plcR, papR</i>    | 1321 bp |
| RRf3           | RegulatorR2    | <i>yvrH</i>          | 671 bp  |
| RRf3           | HKr6           | <i>yvrH, yvrG</i>    | 1743 bp |
| RRf6           | HKr6           | <i>yvrH, yvrG</i>    | 1118 bp |
| RRf5           | HKr6           | <i>yvrH, yvrG</i>    | 957 bp  |
| RRf3           | HKr6           | <i>yvrH, yvrG</i>    | 1743 bp |
| HKf6           | HKR1           | <i>yvrG</i>          | 895 bp  |
| HKf6           | R8             | <i>yvrG</i>          | 1451 bp |
| HK1            | R6             | <i>yvrG</i>          | 660 bp  |
| HK2            | R5             | <i>yvrG, orf2</i>    | 645 bp  |
| HK1            | orf2R4         | <i>yvrG, orf2</i>    | 1256 bp |
| HKf6           | R4FR           | <i>yvrG, orf2</i>    | 2009 bp |
| orf2F1         | R3fr           | <i>orf2, cytK</i>    | 948 bp  |
| orf2F3         | Rent3          | <i>orf2, cytK</i>    | 1734 bp |
| F3fr           | Rent1          | <i>cytK</i>          | 627 bp  |
| F6FR           | R2cytK         | <i>cytK</i>          | 674 bp  |
| Fent1          | Rent2          | <i>cytK</i>          | 651 bp  |
| Fent1          | Rent3          | <i>cytK</i>          | 748 bp  |
| Fent2          | Rent3          | <i>cytK</i>          | 554 bp  |
| nhe391F12      | nhe391R13      | <i>nheA</i> promoter | 832 bp  |
| nhe391F12      | nhe391R9       | <i>nheA</i>          | 1152 bp |
| nhe391F12      | nhe391R8       | <i>nheA</i>          | 1864 bp |
| nhe391F11      | nhe391R9       | <i>nheA</i>          | 538 bp  |
| nhe391F11      | nhe391R8       | <i>nheA</i>          | 1246 bp |
| nhe391F12      | nhe391R6       | <i>nheA, nheB</i>    | 2596 bp |
| nhe391F11      | nhe391R6       | <i>nheA, nheB</i>    | 1978 bp |
| nhe391F7       | nhe391R7       | <i>nheA, nheB</i>    | 814 bp  |
| nhe391F9       | nhe391R7       | <i>nheA, nheB</i>    | 1626 bp |
| nhe391F7       | nhe391R4       | <i>nheA, nheB</i>    | 1050 bp |
| nhe391F8       | nhe391R2       | <i>nheB</i>          | 861 bp  |
| nhe391F1       | nhe391R14      | <i>nheB, nheC</i>    | 1267 bp |
| nhe391F8       | nhe391R5       | <i>nheB, nheC</i>    | 1487 bp |
| nhe391F2       | nhe391R10      | <i>nheC, deoR</i>    | 1530 bp |
| nhe391F10      | nhe391R11      | <i>deoR</i>          | 863 bp  |

Primer sequences:

|              |                         |         |                           |
|--------------|-------------------------|---------|---------------------------|
| F3fr:        | aacagatcgggtcaaaatgc    | RRf6:   | ccgctcagctatttcagctc      |
| F6FR:        | gcattatctgctgtgtggc     | yvfF11: | gcagtggaaacgtggaagtct     |
| Fent1:       | agtaacttggctctgattccg   | yvfF13: | ggcactgtatctttctctgt      |
| Fent2:       | atgaaacagatgcacgagge    | yvfF2:  | aagaaaaagacaggaagcggta    |
| HK1:         | gaacaggacttggctctgc     | yvfF4:  | gcattgcaccaacaaaaag       |
| HK2:         | caattgaaagtgaacttggg    | yvfF6:  | ggggtggagagatggaaaag      |
| HKf6:        | gatgaggatgtaatcgcgaaa   | yvfR2:  | cgcataagcttcgtaataactt    |
| HKR1:        | cgagaccaagtctctgttc     | yvfR3:  | gcgctcttcgcgttttacta      |
| HKr6:        | tgagccaacgcattgtatgt    | yvfR4:  | atgcgattgcatttgcgtga      |
| nhe391F1:    | tgacaggcagaaattcaaa     | yvfR5:  | ttgccggtatgctagaacaa      |
| nhe391F10:   | tgaaatcgctcgaaaaatgg    | yvfR6:  | ccgcttctgtctttttctt       |
| nhe391F11:   | cgtaataaggcgcgtgtgtt    | yvfR7:  | cgcatagatgcgccttacta      |
| nhe391F12:   | tcagcttcatggtggaattg    | yvfR8:  | gaaatgaagtacgccttatacaaca |
| nhe391F2:    | gcaatggtgcaaacacatc     |         |                           |
| nhe391F7:    | aaacgaagcagagtaacagaaa  |         |                           |
| nhe391F8:    | aagatgcaatggaacgcact    |         |                           |
| nhe391F9:    | gcttactacgaaggggagca    |         |                           |
| nhe391R10:   | aagcaatcgtctcatttgc     |         |                           |
| nhe391R11:   | tgcaatgttatatctttcactcc |         |                           |
| nhe391R13:   | acattcagcccttgcactct    |         |                           |
| nhe391R14:   | cggcatcaattgtttctgtc    |         |                           |
| nhe391R2:    | ctcccattgtatgccactga    |         |                           |
| nhe391R4:    | gctgtggctacagaggaacc    |         |                           |
| nhe391R5:    | tgttgattgcgcttgaaaaa    |         |                           |
| nhe391R6:    | tcccttgcagagttgctt      |         |                           |
| nhe391R7:    | caacctgttaatccctttgtca  |         |                           |
| nhe391R8:    | atcaacgagctccgtaaagc    |         |                           |
| nhe391R9:    | actactcatcgcgctcacct    |         |                           |
| orf2F1:      | gcaacgaaaggttctctcca    |         |                           |
| orf2F3:      | gtctgttatgagcttaggttgg  |         |                           |
| orf2R4:      | cgaaggaaatgaaagaggaga   |         |                           |
| plcR391F1:   | gatgaggggttaacgcaaa     |         |                           |
| plcR391F2:   | gcgtgcaagcagaaaagctagg  |         |                           |
| plcR391F4:   | ggtgattttaccgcaacag     |         |                           |
| plcR391R1:   | ttgctcaccatcccattaca    |         |                           |
| plcR391R2:   | tcggttaaaccctcatcactc   |         |                           |
| plcR391R4:   | ttgctggggacgatattagc    |         |                           |
| R2cytK:      | gaatacataaataattggtttcc |         |                           |
| R3fr:        | gtgttttgcatttgaccg      |         |                           |
| R4FR:        | caccagcgatgactaagcc     |         |                           |
| R5:          | tatgttcttagggaagagc     |         |                           |
| R6:          | gttactacaatcactttcc     |         |                           |
| R8:          | ggagagaaccttctgtgc      |         |                           |
| RegulatorR2: | ttcggattctcgcaaaagaagat |         |                           |
| Rent1:       | cgtgcatctgtttcatgagg    |         |                           |
| Rent2:       | tattgttcgttcaccttgc     |         |                           |
| Rent3:       | aatcgtaataggtgttccgg    |         |                           |
| RRf3:        | tcacactatctctccccta     |         |                           |
| RRf5:        | aaccaagcaaccacagta      |         |                           |
